# Supplementary material for: The United States Swine Pathogen Database: integrating veterinary diagnostic laboratory sequence data to monitor emerging pathogens of swine
Source: Oxford University Press journal article supplement (doi:10.1093/database/baab078), 2021-01-01
Supplement: baab078_supp.zip [file baab078_supp.zip]

Archive with 1 entries (1 files):
- exhibit4-copyright-usspd-v1.pdf
