# Supplementary material for: The United States Swine Pathogen Database: integrating veterinary diagnostic laboratory sequence data to monitor emerging pathogens of swine
Source: Oxford University Press journal article supplement (doi:10.1093/database/baab078), 2021-01-01
Supplement: baab078_supp.zip [file baab078_supp.zip › exhibit4-copyright-usspd-v1.pdf]

## Exhibit 4: Certification of U.S. Government Material as Public Domain Content

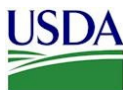

### United States Department of Agriculture Agricultural Research Service (ARS)

*This certification modifies and supersedes solely with respect to ARS any conflicting provisions that may be in the publisher's standard copyright agreement.*

USDA author's name: Tavis K. Anderson

USDA agency: Agricultural Research Service

Article/chapter title: The United States Swine Pathogen Database: integrating veterinary diagnostic laboratory sequence data to monitor emerging pathogens of swine

Journal/book title: Database

Publisher: Oxford Academic

The article/chapter cited was prepared by a U.S. Department of Agriculture employee as part of his/her official duties. Copyright protection under U.S. Copyright Law Title 17 U.S.C. § 105 is not available for such works. Accordingly, there is no copyright to transfer. The fact that the private publication in which the article appears is itself copyrighted does not affect the material of the U.S. Government, which can be freely reproduced by the public. Articles and other publications prepared as part of a Federal employee's official duties are property of the U.S. Government.

No royalty income or other compensation may be accepted for work done as part of official duties. An employee may not designate, recommend, nor specify donation of compensation to a charitable organization. Compensation does not include copies of publications or similar articles that provide a record of the writing activity. The Government employee, on behalf of the Agency, may accept a limited number of reprints or copies of the publication. Materials received should be distributed/maintained according to Agency procedures.

A handwritten signature in blue ink, appearing to read "T. Anderson", is written over a horizontal line.

Signature

Tavis K. Anderson

Date

Printed Name

(rev. 7/2/2009)
